# Supplementary material for: Molecular architecture of the luminal ring of the Xenopus laevis nuclear pore complex
Source: PubMed Central journal article supplement (PMC7264284; doi:10.1038/s41422-020-0320-y), 2020-05-04
Supplement: 41422_2020_320_MOESM5_ESM.pdf [file 41422_2020_320_MOESM5_ESM.pdf]

Supplementary information, Fig. S5

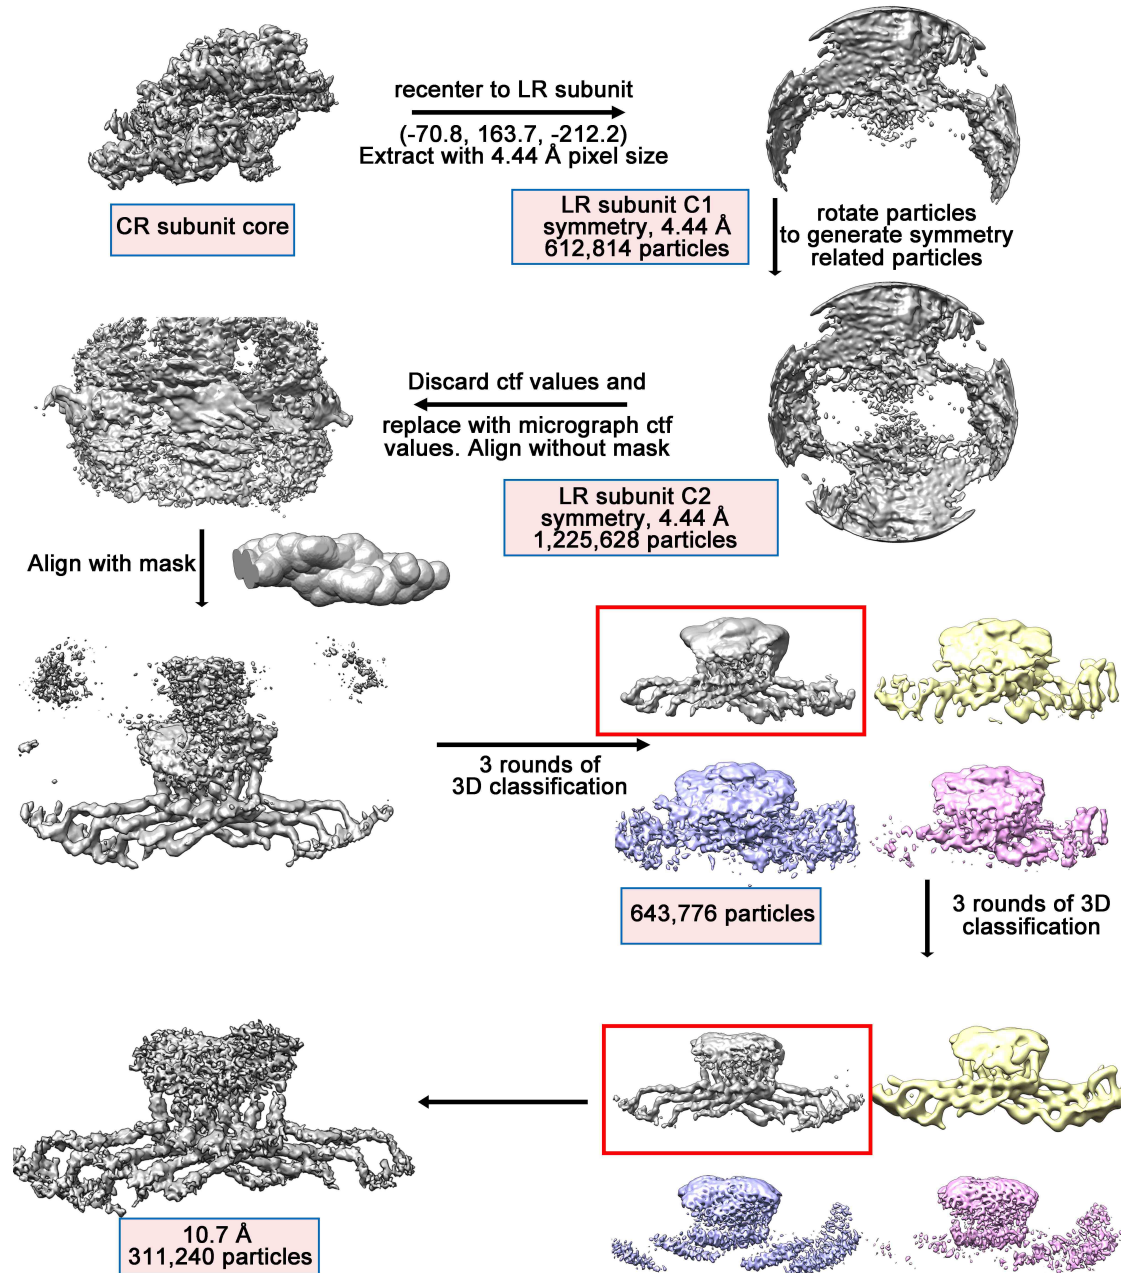

Supplementary information, Fig. S5 | A flow chart for the processing of the cryo-EM data on the LR subunit of the NPC from *X. laevis*. Single-particle analysis (SPA) was applied in data processing. For detailed description, please refer to the Methods.
