# Supplementary material for: Molecular architecture of the luminal ring of the Xenopus laevis nuclear pore complex
Source: PubMed Central journal article supplement (PMC7264284; doi:10.1038/s41422-020-0320-y), 2020-05-04
Supplement: 41422_2020_320_MOESM12_ESM.pdf [file 41422_2020_320_MOESM12_ESM.pdf]

**Supplementary information, Table S1** | Cryo-ET data collection and STA reconstruction statistics.

| <b>Data collection</b>                          |                               |                       |                   |          |
|-------------------------------------------------|-------------------------------|-----------------------|-------------------|----------|
| EM equipment                                    | Titan Krios                   |                       |                   |          |
| Voltage (kV)                                    | 300                           |                       |                   |          |
| Detector                                        | Gatan K2                      |                       |                   |          |
| Energy filter                                   | Gatan GIF Quantum, 20 eV slit |                       |                   |          |
| Pixel size (Å)                                  | 2.222                         |                       |                   |          |
| Tilt schemes                                    | Dose-symmetric scheme         | Bi-directional scheme | Continuous scheme |          |
| Number of tilt-series                           | 240                           | 874                   | 311               |          |
| Electron dose (e <sup>-</sup> /Å <sup>2</sup> ) | 90 ~ 150                      |                       |                   |          |
| Defocus range (µm)                              | -2.0 ~ -4.0                   |                       |                   |          |
| Software                                        | SerialEM                      |                       |                   |          |
| <b>Reconstruction</b>                           |                               |                       |                   |          |
| Software                                        | Dynamo/RELION3.0-beta         |                       |                   |          |
| Data set                                        | LR                            | CR                    | IR                | NR       |
| Number of used Particles                        | 34,087                        | 112,196               | 34,086            | 34,068   |
| Final Resolution (Å)                            | 15.1                          | 9.1                   | 13.1              | 13.6     |
| Map sharpening B-factor (Å <sup>2</sup> )       | -2000                         | -1000                 | -2000             | -2000    |
| EMDB accession code                             | EMD-0983                      | EMD-0986              | EMD-0997          | EMD-0998 |
