# Supplementary material for: Molecular architecture of the luminal ring of the Xenopus laevis nuclear pore complex
Source: PubMed Central journal article supplement (PMC7264284; doi:10.1038/s41422-020-0320-y), 2020-05-04
Supplement: 41422_2020_320_MOESM13_ESM.pdf [file 41422_2020_320_MOESM13_ESM.pdf]

**Supplementary information, Table S2 | Cryo-EM data collection and SPA**

reconstruction statistics.

| <b>Data collection</b>                                    |                                  |        |        |        |
|-----------------------------------------------------------|----------------------------------|--------|--------|--------|
| EM equipment                                              | Titan Krios                      |        |        |        |
| Voltage (kV)                                              | 300                              |        |        |        |
| Detector                                                  | Gatan K2                         |        |        |        |
| Energy filter                                             | Gatan GIF Quantum, 20 eV slit    |        |        |        |
| Pixel size (Å)                                            | 2.222                            |        |        |        |
| Magnification                                             | 22,502                           |        |        |        |
| Data set                                                  | Tilt0                            | Tilt30 | Tilt45 | Tilt55 |
| Exposure rate (e <sup>-</sup> /(s·Å <sup>2</sup> ))       | 2.612                            | 2.612  | 2.612  | 2.612  |
| Number of frames                                          | 40                               | 46     | 56     | 70     |
| Total Electron exposure (e <sup>-</sup> /Å <sup>2</sup> ) | 52                               | 60     | 78     | 91     |
| Defocus range (µm)                                        | -1.0 ~ -4.0                      |        |        |        |
| Total Number of images                                    | 4,606                            | 4,186  | 4,158  | 10,111 |
| Selected Number of images                                 | 3,250                            | 2,888  | 2,745  | 3,516  |
| Software                                                  | AutoEMation2                     |        |        |        |
| <b>Reconstruction</b>                                     |                                  |        |        |        |
| Software                                                  | RELION2.1/RELION3.0-beta/THUNDER |        |        |        |
| Number of used Particles                                  | 311,240                          |        |        |        |
| Symmetry/Final resolution (Å)                             | C1/10.7                          |        |        |        |
| Masked regions                                            | Grid domain & Finger domain      |        |        |        |
| Number of Micrographs used                                | 12,399                           |        |        |        |
| Number of extracted particles                             | 612,814                          |        |        |        |
| Final number of particles                                 | 311,240                          |        |        |        |
| Local Resolution Ranges (Å)                               | 9 ~ 13                           |        |        |        |
| Map sharpening B-factor (Å <sup>2</sup> )                 | -2000                            |        |        |        |
| Accuracy of rotation (°)                                  | 4.48                             |        |        |        |
| Accuracy of translation (pixels)                          | 1.34                             |        |        |        |
| EMDB accession code                                       | EMD-0982                         |        |        |        |
